# Supplementary material
Source: PubMed Central journal article supplement (PMC3293647)
Supplement: supp_blood-2011-10-383661_blood-2011-10-383661-1.pdf [file supp_blood-2011-10-383661_blood-2011-10-383661-1.pdf]

**Table S1A. Genotype frequency of FVIII SNPs included in the study (%) (N = 10,434)<sup>1</sup>**

|     |                  | EA Females<br>(N = 4,282) |          |            | EA Males<br>(N = 3,774) |           | AA Females<br>(N = 1,505) |           |           | AA Males<br>(N = 873) |           |           |           |                  |
|-----|------------------|---------------------------|----------|------------|-------------------------|-----------|---------------------------|-----------|-----------|-----------------------|-----------|-----------|-----------|------------------|
| SNP | A B              | AA                        | AB       | BB         | A                       | B         | AA                        | AB        | BB        | A                     | B         | location  |           |                  |
| 1   | RS1470586        | C                         | T        | 59         | 35                      | 5         | 76                        | 24        | 58        | 37                    | 5         | 78        | 22        | Intron 1         |
| 2   | RS5987077        | A                         | T        | 55         | 38                      | 7         | 74                        | 26        | 10        | 42                    | 48        | 31        | 69        | Intron 3         |
| 3   | RS7056252        | A                         | G        | 100        | 0                       | 0         | 100                       | 0         | 87        | 12                    | 0         | 93        | 7         | Intron 6         |
| 4   | RS5986899        | A                         | G        | 100        | 0                       | 0         | 100                       | 0         | 93        | 7                     | 0         | 96        | 4         | Intron 9         |
| 5   | RS5987073        | A                         | G        | 99         | 1                       | 0         | 99                        | 1         | 92        | 8                     | 1         | 95        | 5         | Intron 9         |
| 6   | <b>RS5945258</b> | <b>C</b>                  | <b>T</b> | <b>71</b>  | <b>26</b>               | <b>3</b>  | <b>85</b>                 | <b>15</b> | <b>56</b> | <b>38</b>             | <b>6</b>  | <b>73</b> | <b>27</b> | <b>Intron 11</b> |
| 7   | <b>RS7061362</b> | <b>C</b>                  | <b>T</b> | <b>71</b>  | <b>26</b>               | <b>3</b>  | <b>85</b>                 | <b>15</b> | <b>57</b> | <b>38</b>             | <b>6</b>  | <b>73</b> | <b>27</b> | <b>Intron 11</b> |
| 8   | RS5987061        | C                         | T        | 100        | 0                       | 0         | 100                       | 0         | 93        | 7                     | 0         | 96        | 4         | Intron 13        |
| 9   | RS5987068        | G                         | A        | 100        | 0                       | 0         | 100                       | 0         | 93        | 7                     | 0         | 96        | 4         | Intron 13        |
| 10  | <b>RS5945122</b> | <b>A</b>                  | <b>C</b> | <b>71</b>  | <b>26</b>               | <b>3</b>  | <b>85</b>                 | <b>15</b> | <b>57</b> | <b>38</b>             | <b>5</b>  | <b>73</b> | <b>27</b> | <b>Intron 13</b> |
| 11  | RS6643622        | T                         | G        | 48         | 42                      | 10        | 69                        | 30        | 3         | 27                    | 70        | 17        | 83        | Intron 13        |
| 12  | <b>RS6643714</b> | <b>T</b>                  | <b>C</b> | <b>39</b>  | <b>47</b>               | <b>14</b> | <b>63</b>                 | <b>37</b> | <b>1</b>  | <b>16</b>             | <b>83</b> | <b>8</b>  | <b>92</b> | <b>Intron 14</b> |
| 13  | <b>RS5987057</b> | <b>A</b>                  | <b>G</b> | <b>100</b> | <b>0</b>                | <b>0</b>  | <b>100</b>                | <b>0</b>  | <b>93</b> | <b>7</b>              | <b>0</b>  | <b>96</b> | <b>4</b>  | <b>Intron 14</b> |
| 14  | RS12014480       | G                         | A        | 100        | 0                       | 0         | 100                       | 0         | 56        | 39                    | 5         | 75        | 25        | Intron 14        |
| 15  | RS5987056        | C                         | T        | 100        | 0                       | 0         | 100                       | 0         | 94        | 6                     | 0         | 96        | 4         | Intron 14        |
| 16  | RS4898352        | A                         | T        | 54         | 38                      | 7         | 74                        | 26        | 3         | 29                    | 68        | 17        | 83        | Intron 18        |
| 17  | RS1800297        | T                         | C        | 100        | 0                       | 0         | 100                       | 0         | 58        | 37                    | 5         | 76        | 24        | Exon 26          |
| 18  | RS7357998        | C                         | T        | 100        | 0                       | 0         | 100                       | 0         | 91        | 8                     | 0         | 96        | 4         | Intron 26        |
| 19  | RS12392769       | G                         | T        | 100        | 0                       | 0         | 100                       | 0         | 92        | 8                     | 1         | 96        | 4         | Intron 26        |

**Table S1B. Genotype frequencies of VWF SNPs included in the study (%) (N = 10,434)<sup>1</sup>**

|     |            | EA Females<br>(N = 4,282) |    |    | EA Males<br>(N = 3,774) |    |    | AA Females<br>(N = 1,505) |    |    | AA Males<br>(N = 873) |    |    |           |           |
|-----|------------|---------------------------|----|----|-------------------------|----|----|---------------------------|----|----|-----------------------|----|----|-----------|-----------|
| SNP | A B        | AA                        | AB | BB | AA                      | AB | BB | AA                        | AB | BB | AA                    | AB | BB | Location* |           |
| 1   | RS933408   | T G                       | 64 | 32 | 3                       | 65 | 31 | 4                         | 74 | 24 | 2                     | 72 | 26 | 2         | Intron 51 |
| 2   | RS2270151  | G A                       | 73 | 25 | 2                       | 72 | 26 | 3                         | 86 | 14 | 1                     | 86 | 13 | 1         | Intron 50 |
| 3   | RS2270152  | T G                       | 63 | 33 | 4                       | 62 | 33 | 5                         | 82 | 17 | 1                     | 82 | 18 | 1         | Intron 49 |
| 4   | RS3759320  | T C                       | 37 | 47 | 16                      | 35 | 50 | 15                        | 61 | 34 | 5                     | 59 | 36 | 4         | Intron 47 |
| 5   | RS3759321  | G A                       | 27 | 49 | 24                      | 26 | 50 | 23                        | 21 | 49 | 30                    | 22 | 50 | 28        | Intron 47 |
| 6   | RS7958883  | A T                       | 39 | 46 | 15                      | 37 | 49 | 14                        | 84 | 16 | 1                     | 84 | 16 | 0         | Intron 47 |
| 7   | RS12317523 | C T                       | 50 | 41 | 9                       | 52 | 40 | 8                         | 32 | 50 | 18                    | 33 | 51 | 15        | Intron 47 |
| 8   | RS723190   | T C                       | 89 | 11 | 0                       | 89 | 11 | 0                         | 77 | 22 | 1                     | 76 | 22 | 2         | Intron 47 |
| 9   | RS11063953 | A G                       | 52 | 40 | 8                       | 54 | 38 | 8                         | 53 | 39 | 8                     | 54 | 40 | 6         | Intron 47 |
| 10  | RS12369177 | G T                       | 38 | 47 | 15                      | 38 | 48 | 15                        | 57 | 38 | 5                     | 58 | 37 | 5         | Intron 47 |
| 11  | RS4764478  | T A                       | 60 | 34 | 6                       | 61 | 34 | 5                         | 61 | 33 | 6                     | 62 | 32 | 6         | Intron 46 |
| 12  | RS7301070  | A G                       | 43 | 46 | 11                      | 42 | 46 | 12                        | 54 | 38 | 8                     | 49 | 42 | 9         | Intron 44 |
| 13  | RS216852   | C G                       | 44 | 45 | 11                      | 44 | 45 | 11                        | 14 | 46 | 40                    | 15 | 44 | 40        | Intron 43 |
| 14  | RS4764521  | G A                       | 63 | 32 | 5                       | 65 | 31 | 4                         | 89 | 10 | 1                     | 86 | 13 | 1         | Intron 43 |
| 15  | RS3819540  | G A                       | 99 | 1  | 0                       | 99 | 1  | 0                         | 92 | 8  | 0                     | 92 | 7  | 0         | Intron 42 |
| 16  | RS216855   | G A                       | 54 | 39 | 7                       | 55 | 38 | 7                         | 26 | 50 | 24                    | 25 | 50 | 25        | Intron 42 |
| 17  | RS216856   | C T                       | 43 | 45 | 12                      | 43 | 45 | 12                        | 20 | 50 | 30                    | 21 | 49 | 30        | Intron 42 |
| 18  | RS216865   | C T                       | 43 | 45 | 12                      | 43 | 45 | 12                        | 21 | 50 | 29                    | 22 | 50 | 28        | Intron 42 |
| 19  | RS6489686  | C T                       | 72 | 26 | 2                       | 72 | 25 | 2                         | 64 | 32 | 4                     | 63 | 34 | 3         | Intron 42 |
| 20  | RS11063975 | C A                       | 84 | 15 | 1                       | 85 | 15 | 1                         | 93 | 7  | 0                     | 97 | 3  | 0         | Intron 38 |
| 21  | RS216887   | C T                       | 29 | 50 | 21                      | 28 | 51 | 22                        | 19 | 52 | 29                    | 21 | 49 | 30        | Intron 38 |

|     |            | EA Females<br>(N = 4,282) |     |    | EA Males<br>(N = 3,774) |     |    | AA Females<br>(N = 1,505) |    |    | AA Males<br>(N = 873) |    |    |           |           |
|-----|------------|---------------------------|-----|----|-------------------------|-----|----|---------------------------|----|----|-----------------------|----|----|-----------|-----------|
| SNP | A B        | AA                        | AB  | BB | AA                      | AB  | BB | AA                        | AB | BB | AA                    | AB | BB | Location* |           |
| 22  | RS7968035  | G A                       | 100 | 0  | 0                       | 100 | 0  | 0                         | 90 | 10 | 0                     | 90 | 9  | 0         | Intron 38 |
| 23  | RS216888   | G A                       | 29  | 50 | 21                      | 28  | 51 | 22                        | 19 | 52 | 29                    | 21 | 50 | 29        | Intron 38 |
| 24  | RS10849375 | G C                       | 85  | 14 | 1                       | 84  | 15 | 1                         | 94 | 5  | 0                     | 97 | 3  | 0         | Intron 38 |
| 25  | RS216896   | T C                       | 28  | 50 | 21                      | 27  | 51 | 22                        | 18 | 50 | 32                    | 20 | 49 | 31        | Intron 38 |
| 26  | RS12579603 | A G                       | 42  | 46 | 12                      | 40  | 47 | 12                        | 86 | 14 | 0                     | 87 | 13 | 0         | Intron 37 |
| 27  | RS216903   | C T                       | 29  | 50 | 21                      | 28  | 51 | 22                        | 32 | 50 | 18                    | 32 | 51 | 17        | Intron 34 |
| 28  | RS216904   | T C                       | 38  | 48 | 15                      | 38  | 47 | 14                        | 50 | 41 | 9                     | 48 | 42 | 10        | Intron 34 |
| 29  | RS216905   | C T                       | 58  | 36 | 6                       | 59  | 36 | 5                         | 74 | 24 | 2                     | 71 | 26 | 3         | Intron 34 |
| 30  | RS216801   | G A                       | 37  | 48 | 15                      | 38  | 47 | 15                        | 50 | 42 | 9                     | 47 | 43 | 10        | Intron 34 |
| 31  | RS542993   | T C                       | 27  | 50 | 23                      | 27  | 50 | 23                        | 51 | 41 | 8                     | 51 | 41 | 8         | Intron 34 |
| 32  | RS216308   | C T                       | 35  | 47 | 17                      | 35  | 47 | 18                        | 77 | 20 | 2                     | 78 | 19 | 3         | Intron 31 |
| 33  | RS1800385  | C A                       | 83  | 16 | 1                       | 83  | 16 | 1                         | 95 | 5  | 0                     | 96 | 4  | 0         | Exon 28   |
| 34  | RS216312   | C T                       | 30  | 50 | 20                      | 29  | 52 | 19                        | 57 | 39 | 4                     | 55 | 39 | 6         | Intron 27 |
| 35  | RS216313   | A G                       | 88  | 12 | 1                       | 88  | 12 | 0                         | 97 | 3  | 0                     | 98 | 2  | 0         | Intron 27 |
| 36  | RS2854871  | T C                       | 85  | 15 | 1                       | 85  | 15 | 1                         | 77 | 22 | 1                     | 80 | 19 | 1         | Intron 24 |
| 37  | RS11609815 | C G                       | 56  | 38 | 7                       | 55  | 38 | 7                         | 36 | 49 | 16                    | 32 | 50 | 18        | Intron 24 |
| 38  | RS11063995 | T C                       | 56  | 38 | 6                       | 55  | 38 | 7                         | 36 | 49 | 16                    | 32 | 51 | 17        | Intron 22 |
| 39  | RS216315   | G A                       | 83  | 16 | 1                       | 84  | 15 | 1                         | 94 | 6  | 0                     | 93 | 7  | 0         | Intron 22 |
| 40  | RS11612401 | G C                       | 56  | 38 | 6                       | 55  | 38 | 7                         | 74 | 24 | 2                     | 69 | 29 | 3         | Intron 22 |
| 41  | RS11610629 | A C                       | 56  | 38 | 6                       | 55  | 39 | 6                         | 54 | 40 | 6                     | 50 | 43 | 7         | Intron 22 |
| 42  | RS1800380  | C T                       | 56  | 38 | 6                       | 55  | 38 | 7                         | 50 | 42 | 8                     | 46 | 44 | 10        | Exon 22   |
| 43  | RS216318   | C A                       | 83  | 16 | 1                       | 84  | 15 | 1                         | 92 | 8  | 0                     | 92 | 8  | 0         | Intron 21 |
| 44  | RS11609728 | C A                       | 56  | 38 | 6                       | 56  | 38 | 7                         | 81 | 19 | 1                     | 77 | 22 | 1         | Intron 21 |

|     |            | EA Females<br>(N = 4,282) |     |    | EA Males<br>(N = 3,774) |     |    | AA Females<br>(N = 1,505) |     |    | AA Males<br>(N = 873) |     |    |           |           |
|-----|------------|---------------------------|-----|----|-------------------------|-----|----|---------------------------|-----|----|-----------------------|-----|----|-----------|-----------|
| SNP | A B        | AA                        | AB  | BB | AA                      | AB  | BB | AA                        | AB  | BB | AA                    | AB  | BB | Location* |           |
| 45  | RS216327   | C T                       | 43  | 44 | 12                      | 43  | 45 | 12                        | 64  | 33 | 3                     | 60  | 34 | 6         | Intron 18 |
| 46  | RS216329   | C T                       | 43  | 44 | 12                      | 43  | 45 | 12                        | 64  | 33 | 3                     | 60  | 34 | 6         | Intron 18 |
| 47  | RS1063857  | A G                       | 41  | 46 | 13                      | 40  | 47 | 13                        | 16  | 50 | 33                    | 15  | 48 | 37        | Exon 18   |
| 48  | RS216295   | C T                       | 82  | 17 | 1                       | 83  | 16 | 1                         | 66  | 31 | 3                     | 69  | 27 | 3         | Intron 17 |
| 49  | RS16932374 | C T                       | 100 | 0  | 0                       | 100 | 0  | 0                         | 68  | 29 | 3                     | 68  | 29 | 3         | Exon17    |
| 50  | RS216298   | T C                       | 82  | 17 | 1                       | 83  | 16 | 1                         | 71  | 27 | 3                     | 73  | 24 | 3         | Intron 16 |
| 51  | RS216299   | G A                       | 82  | 17 | 1                       | 83  | 16 | 1                         | 71  | 27 | 3                     | 73  | 24 | 3         | Intron 16 |
| 52  | RS2239161  | A G                       | 79  | 20 | 2                       | 79  | 20 | 1                         | 89  | 11 | 0                     | 88  | 12 | 0         | Intron 15 |
| 53  | RS2239160  | G A                       | 79  | 19 | 2                       | 79  | 19 | 1                         | 75  | 23 | 2                     | 73  | 25 | 2         | Intron 15 |
| 54  | RS7954351  | A T                       | 52  | 41 | 7                       | 52  | 40 | 8                         | 20  | 49 | 32                    | 18  | 50 | 31        | Intron 15 |
| 55  | RS12304995 | C T                       | 40  | 48 | 13                      | 39  | 48 | 13                        | 19  | 52 | 30                    | 17  | 49 | 34        | Intron 15 |
| 56  | RS10744696 | C A                       | 36  | 48 | 16                      | 35  | 48 | 16                        | 54  | 39 | 7                     | 50  | 44 | 7         | Intron 13 |
| 57  | RS7139057  | T G                       | 67  | 30 | 4                       | 67  | 30 | 4                         | 76  | 23 | 2                     | 72  | 27 | 1         | Intron 13 |
| 58  | RS12319392 | G T                       | 84  | 15 | 1                       | 84  | 15 | 1                         | 44  | 45 | 10                    | 44  | 45 | 11        | Intron 13 |
| 59  | RS2109122  | T C                       | 85  | 14 | 1                       | 86  | 14 | 1                         | 45  | 45 | 10                    | 45  | 45 | 10        | Intron 13 |
| 60  | RS3213721  | C T                       | 100 | 0  | 0                       | 100 | 0  | 0                         | 100 | 0  | 0                     | 100 | 0  | 0         | Intron 8  |
| 61  | RS1800387  | A T                       | 95  | 5  | 0                       | 94  | 6  | 0                         | 35  | 48 | 17                    | 32  | 50 | 18        | Exon 8    |
| 62  | RS7135976  | T C                       | 26  | 50 | 25                      | 25  | 50 | 25                        | 6   | 36 | 58                    | 6   | 36 | 58        | Intron 6  |
| 63  | RS763580   | G C                       | 51  | 41 | 8                       | 53  | 40 | 8                         | 86  | 14 | 1                     | 85  | 15 | 0         | Intron 6  |
| 64  | RS2238103  | A T                       | 41  | 46 | 13                      | 42  | 45 | 13                        | 56  | 38 | 6                     | 55  | 38 | 7         | Intron 6  |
| 65  | RS1610056  | C G                       | 75  | 24 | 2                       | 74  | 24 | 2                         | 64  | 33 | 4                     | 63  | 34 | 3         | Intron 6  |
| 66  | RS2239147  | T C                       | 75  | 24 | 2                       | 74  | 24 | 2                         | 64  | 33 | 3                     | 63  | 34 | 3         | Intron 6  |
| 67  | RS2239145  | C T                       | 75  | 24 | 2                       | 74  | 24 | 2                         | 64  | 33 | 4                     | 63  | 34 | 3         | Intron 6  |

|     |            | EA Females<br>(N = 4,282) |     |    | EA Males<br>(N = 3,774) |    |    | AA Females<br>(N = 1,505) |    |    | AA Males<br>(N = 873) |    |    |           |          |
|-----|------------|---------------------------|-----|----|-------------------------|----|----|---------------------------|----|----|-----------------------|----|----|-----------|----------|
| SNP | A B        | AA                        | AB  | BB | AA                      | AB | BB | AA                        | AB | BB | AA                    | AB | BB | Location* |          |
| 68  | RS2239144  | C A                       | 74  | 24 | 2                       | 74 | 24 | 2                         | 63 | 33 | 4                     | 63 | 34 | 3         | Intron 6 |
| 69  | RS2239143  | A G                       | 100 | 0  | 0                       | 99 | 1  | 0                         | 99 | 1  | 0                     | 99 | 1  | 0         | Intron 6 |
| 70  | RS11064019 | A G                       | 75  | 24 | 2                       | 74 | 24 | 2                         | 65 | 31 | 4                     | 63 | 33 | 4         | Intron 6 |
| 71  | RS11064020 | T C                       | 75  | 24 | 2                       | 74 | 24 | 2                         | 65 | 32 | 3                     | 64 | 33 | 3         | Intron 6 |
| 72  | RS11064021 | A G                       | 75  | 24 | 2                       | 74 | 24 | 2                         | 64 | 33 | 4                     | 63 | 34 | 3         | Intron 5 |
| 73  | RS41388848 | T C                       | 93  | 7  | 0                       | 93 | 7  | 0                         | 58 | 36 | 6                     | 58 | 37 | 5         | Intron 5 |
| 74  | RS12307072 | A T                       | 42  | 45 | 13                      | 40 | 47 | 13                        | 45 | 44 | 11                    | 47 | 43 | 10        | Intron 3 |
| 75  | RS10849385 | A G                       | 40  | 46 | 14                      | 38 | 49 | 14                        | 9  | 42 | 50                    | 10 | 40 | 50        | Intron 3 |

<sup>1</sup>The major alleles were labeled with 'A' and the minor alleles with 'B' defined based on frequencies in EA subjects. A "0" was entered for an allele frequency of 0 - < 0.5%.

\* An intron was numbered as that of exon immediately before the intron.

**Table S2. Demographics and covariates for study subjects by race and sex (N = 10,434)**

| <b>Characteristic</b>                 |            | <b>EA Female<br/>(N = 4,282)</b> | <b>EA Male<br/>(N = 3,774)</b> | <b>AA Female<br/>(N = 1,505)</b> | <b>AA Male<br/>(N = 873)</b> | <b>P value</b>       |
|---------------------------------------|------------|----------------------------------|--------------------------------|----------------------------------|------------------------------|----------------------|
| Age at visit 1 (years) <sup>1</sup>   | Mean (s.d) | 53.88 (5.67)                     | 54.59 (5.70)                   | 53.34 (5.73)                     | 53.36 (5.92)                 | <1 x10 <sup>-8</sup> |
| BMI (kg/m <sup>2</sup> ) <sup>1</sup> | Mean (s.d) | 26.58 (5.39)                     | 27.38 (3.94)                   | 30.69 (6.51)                     | 27.88 (4.79)                 | <1 x10 <sup>-8</sup> |
| Cigarette smoking <sup>2, *</sup>     |            | 2134 (50%)                       | 2708 (72%)                     | 637 (42%)                        | 620 (71%)                    | <1 x10 <sup>-8</sup> |
| Diabetes <sup>2</sup>                 |            | 304 (7%)                         | 367 (10%)                      | 291 (19%)                        | 141 (16%)                    | <1 x10 <sup>-8</sup> |
| Hypertension <sup>2</sup>             |            | 1,110 (26%)                      | 1,031 (27%)                    | 834 (55%)                        | 459 (53%)                    | <1 x10 <sup>-8</sup> |

<sup>1</sup> Analysis of Variance

<sup>2</sup> Chi-square tes;

\* Cigarette smoking included current smokers and those who ever smoked.

**Table S3A. Quartile of VWF antigen by quartile of FVIII activity for EA females (N = 4,282)**

| Quartile | VWF             |                 |                 |                 | Total     |             |
|----------|-----------------|-----------------|-----------------|-----------------|-----------|-------------|
|          | 1 <sup>st</sup> | 2 <sup>nd</sup> | 3 <sup>rd</sup> | 4 <sup>th</sup> |           |             |
| FVIII    | 1 <sup>st</sup> | 753 (63%)       | 257 (22%)       | 74 (7%)         | 19 (2%)   | 1,103 (26%) |
|          | 2 <sup>nd</sup> | 348 (29%)       | 451 (39%)       | 247 (24%)       | 67 (8%)   | 1,113 (26%) |
|          | 3 <sup>rd</sup> | 81 (7%)         | 345 (30%)       | 415 (40%)       | 251 (29%) | 1,092 (26%) |
|          | 4 <sup>th</sup> | 20 (2%)         | 105 (9%)        | 312 (30%)       | 537 (61%) | 974 (23%)   |

**Table S3B. Quartile of VWF antigen by quartile of FVIII activity for EA males (N = 3,774)**

| Quartile | VWF             |                 |                 |                 | Total     |             |
|----------|-----------------|-----------------|-----------------|-----------------|-----------|-------------|
|          | 1 <sup>st</sup> | 2 <sup>nd</sup> | 3 <sup>rd</sup> | 4 <sup>th</sup> |           |             |
| FVIII    | 1 <sup>st</sup> | 729 (75%)       | 305 (31%)       | 85 (9%)         | 27 (3%)   | 1,146 (30%) |
|          | 2 <sup>nd</sup> | 187 (19%)       | 410 (42%)       | 321 (33%)       | 108 (13%) | 1,026 (27%) |
|          | 3 <sup>rd</sup> | 47 (5%)         | 214 (22%)       | 369 (38%)       | 292 (34%) | 922 (24%)   |
|          | 4 <sup>th</sup> | 13 (1%)         | 48 (5%)         | 184 (19%)       | 435 (50%) | 680 (18%)   |

**Table S3C. Quartile of VWF antigen by quartile of FVIII activity for AA females (N = 1,505)**

| Quartile                        | VWF             |                 |                 |                 | Total     |
|---------------------------------|-----------------|-----------------|-----------------|-----------------|-----------|
|                                 | 1 <sup>st</sup> | 2 <sup>nd</sup> | 3 <sup>rd</sup> | 4 <sup>th</sup> |           |
| <b>FVIII</b><br>1 <sup>st</sup> | 151 (51%)       | 44 (15%)        | 26 (7%)         | 7 (1%)          | 228 (15%) |
| 2 <sup>nd</sup>                 | 92 (31%)        | 117 (39%)       | 69 (20%)        | 25 (4%)         | 303 (20%) |
| 3 <sup>rd</sup>                 | 43 (15%)        | 94 (31%)        | 138 (39%)       | 98 (18%)        | 373 (25%) |
| 4 <sup>th</sup>                 | 8 (3%)          | 45 (15%)        | 120 (34%)       | 428 (77%)       | 601 (40%) |

**Table S3D. Quartile of VWF antigen by quartile of FVIII activity for AA males (N = 873)**

| Quartile                        | VWF             |                 |                 |                 | Total     |
|---------------------------------|-----------------|-----------------|-----------------|-----------------|-----------|
|                                 | 1 <sup>st</sup> | 2 <sup>nd</sup> | 3 <sup>rd</sup> | 4 <sup>th</sup> |           |
| <b>FVIII</b><br>1 <sup>st</sup> | 120 (65%)       | 36 (18%)        | 9 (4%)          | 3 (1%)          | 168 (19%) |
| 2 <sup>nd</sup>                 | 51 (28%)        | 93 (47%)        | 55 (25%)        | 14 (5%)         | 213 (24%) |
| 3 <sup>rd</sup>                 | 12 (7%)         | 52 (26%)        | 79 (36%)        | 63 (23%)        | 206 (24%) |
| 4 <sup>th</sup>                 | 1 (1%)          | 19 (10%)        | 76 (35%)        | 190 (70%)       | 286 (33%) |



**Table S4. P-value and partial R squares from a multiple linear regression model for FVIII activity**

|                     | <b>P-value</b>       | <b>Partial R<sup>2</sup></b> | <b>Percentage of<br/>Variation Explained</b> |
|---------------------|----------------------|------------------------------|----------------------------------------------|
| <b>Gender</b>       | $<1 \times 10^{-8}$  | 0.00680                      | 0.68                                         |
| <b>Age</b>          | $<1 \times 10^{-8}$  | 0.02239                      | 2.2                                          |
| <b>Race</b>         | $<1 \times 10^{-8}$  | 0.04041                      | 4.0                                          |
| <b>BMI</b>          | $<1 \times 10^{-8}$  | 0.00962                      | 1.0                                          |
| <b>Hypertension</b> | $8.7 \times 10^{-5}$ | 0.00149                      | 0.15                                         |
| <b>Diabetes</b>     | $<1 \times 10^{-8}$  | 0.03536                      | 3.5                                          |
| <b>Ever Smoker</b>  | $9.8 \times 10^{-3}$ | 0.00065                      | 0.06                                         |
| <b>ABO Genotype</b> | $<1 \times 10^{-8}$  | 0.10708                      | 10.7                                         |
| <b>Residual</b>     |                      | 0.776                        | 77.6                                         |

\* Residual Partial R<sup>2</sup> = 1 - R<sup>2</sup>
